# Supplementary material for: Reliability and validity of the World Health Organization reading standards for paediatric chest radiographs used in the field in an impact study of Pneumococcal Conjugate Vaccine in Kilifi, Kenya
Source: PubMed Central journal article supplement (PMC6059459; doi:10.1371/journal.pone.0200715), 2018-07-25
Supplement: pone.0200715.s002.pdf [file pone.0200715.s002.pdf]

**S1 Table. Trend analysis: Linear regression of scores by batch****Percent agreement**

| <b>End-point</b> | <b>Slope*</b> | <b>95% CI</b> | <b>P-value</b> |
|------------------|---------------|---------------|----------------|
| Consolidation    | -0.23         | -0.51 , 0.04  | 0.089          |
| Other Infiltrate | -0.01         | -0.09 , 0.07  | 0.841          |
| Pleural effusion | 0.20          | -0.11 , 0.50  | 0.198          |
| RCP              | -0.17         | -0.35 , 0.02  | 0.084          |

**Kappa**

| <b>End-point</b> | <b>Slope*</b> | <b>95% CI</b> | <b>P-value</b> |
|------------------|---------------|---------------|----------------|
| Consolidation    | -0.22         | -0.71 , 0.27  | 0.374          |
| Other Infiltrate | -0.24         | -1.48 , 0.99  | 0.690          |
| Pleural effusion | 0.23          | -0.32 , 0.79  | 0.400          |
| RCP              | -0.24         | -0.70 , 0.21  | 0.283          |

\*The slope is measured as the change in percentage per batch. To analyse the Kappa scores they were first multiplied by 100.
