# Supplementary material for: Reliability and validity of the World Health Organization reading standards for paediatric chest radiographs used in the field in an impact study of Pneumococcal Conjugate Vaccine in Kilifi, Kenya
Source: PubMed Central journal article supplement (PMC6059459; doi:10.1371/journal.pone.0200715), 2018-07-25
Supplement: pone.0200715.s003.pdf [file pone.0200715.s003.pdf]

**S2 Table. Performance of primary readers in 947 radiographs with discordant readings by the primary readers compared against final readings of the arbitration panel**

**A. Consolidation**

|                         |     | Final arbitration |            |            |
|-------------------------|-----|-------------------|------------|------------|
|                         |     | Yes               | No         | Total      |
| <b>Primary reader A</b> | Yes | 306               | 55         | 361        |
|                         | No  | 139               | 447        | 586        |
| <b>Primary reader B</b> | Yes | 322               | 75         | 397        |
|                         | No  | 123               | 427        | 550        |
| <b>Total</b>            |     | <b>445</b>        | <b>502</b> | <b>947</b> |

**B. Other Infiltrate**

|                         |     | Final arbitration |            |            |
|-------------------------|-----|-------------------|------------|------------|
|                         |     | Yes               | No         | Total      |
| <b>Primary reader A</b> | Yes | 116               | 60         | 176        |
|                         | No  | 263               | 508        | 771        |
| <b>Primary reader B</b> | Yes | 179               | 53         | 232        |
|                         | No  | 200               | 515        | 715        |
| <b>Total</b>            |     | <b>379</b>        | <b>568</b> | <b>947</b> |

### C. Pleural effusion

|                  |     | Final arbitration |     |       |
|------------------|-----|-------------------|-----|-------|
|                  |     | Yes               | No  | Total |
| Primary reader A | Yes | 22                | 32  | 54    |
|                  | No  | 39                | 854 | 893   |
| Primary reader B | Yes | 37                | 44  | 81    |
|                  | No  | 24                | 842 | 866   |
| Total            |     | 61                | 886 | 947   |

### D. Radiologically-confirmed pneumonia

|                  |     | Final arbitration |     |       |
|------------------|-----|-------------------|-----|-------|
|                  |     | Yes               | No  | Total |
| Primary reader A | Yes | 321               | 58  | 379   |
|                  | No  | 139               | 429 | 568   |
| Primary reader B | Yes | 349               | 78  | 427   |
|                  | No  | 111               | 409 | 520   |
| Total            |     | 460               | 487 | 947   |
