# Supplementary material for: Reliability and validity of the World Health Organization reading standards for paediatric chest radiographs used in the field in an impact study of Pneumococcal Conjugate Vaccine in Kilifi, Kenya
Source: PubMed Central journal article supplement (PMC6059459; doi:10.1371/journal.pone.0200715), 2018-07-25
Supplement: pone.0200715.s004.pdf [file pone.0200715.s004.pdf]

**S3 Table. Comparison of Gwet's AC1 with percentage agreement and Cohen's Kappa in the analysis of Intra-observer variation**

| <b>End-point</b> | <b>Reader A</b>          |              |            | <b>Reader B</b>          |              |            |
|------------------|--------------------------|--------------|------------|--------------------------|--------------|------------|
|                  | <b>Percent Agreement</b> | <b>Kappa</b> | <b>AC1</b> | <b>Percent Agreement</b> | <b>Kappa</b> | <b>AC1</b> |
| Consolidation    | 86.8                     | 0.59         | 0.83       | 90.6                     | 0.71         | 0.88       |
| Other Infiltrate | 86.2                     | 0.11         | 0.85       | 91.2                     | 0.47         | 0.91       |
| Pleural effusion | 98.1                     | 0.57         | 0.98       | 98.7                     | 0.85         | 0.99       |
| RCP*             | 88.7                     | 0.63         | 0.84       | 93.1                     | 0.78         | 0.90       |

\*RCP is defined as images with consolidation or pleural fluid or both
