# Supplementary material for: Reliability and validity of the World Health Organization reading standards for paediatric chest radiographs used in the field in an impact study of Pneumococcal Conjugate Vaccine in Kilifi, Kenya
Source: PubMed Central journal article supplement (PMC6059459; doi:10.1371/journal.pone.0200715), 2018-07-25
Supplement: pone.0200715.s005.pdf [file pone.0200715.s005.pdf]

**S4 Table. Comparison of Gwet's AC1 with percent agreement and Cohen's Kappa on Inter-observer variation of the primary readers on 2714 images**

| <b>End-point</b> | <b>Percent Agreement</b> | <b>Kappa</b> | <b>AC1</b> |
|------------------|--------------------------|--------------|------------|
| Consolidation    | 86.0                     | 0.61         | 0.82       |
| Other Infiltrate | 84.4                     | 0.19         | 0.83       |
| Pleural effusion | 96.5                     | 0.43         | 0.96       |
| RCP*             | 89.1                     | 0.68         | 0.84       |

\*RCP is defined as images with consolidation or pleural fluid or both
